# Supplementary material
Source: publisher figshare collection journal article supplement (https://sage.figshare.com/ndownloader/files/34774055)
Supplement: Supplementary file 1 [file 34774055]

## Supplemental Material

### Appendix A: Item wordings, descriptive statistics, and factor loadings

| Variables                                                                                                                                                   | <i>M</i> | <i>SD</i> | <i>Factor loadings</i> |
|-------------------------------------------------------------------------------------------------------------------------------------------------------------|----------|-----------|------------------------|
| Scientists' attention to fake news on science                                                                                                               |          |           |                        |
| On a scale of 1 to 5 ( <i>1 = no attention at all; 5 = a lot of attention</i> ), how much attention do you pay to fake news on science?                     | 2.63     | 1.17      | -                      |
| Presumed harm on other scientists                                                                                                                           |          |           |                        |
| On a scale of 1 to 5 ( <i>1 = no harm at all; 5 = a lot of harm</i> ), how much harm do you think fake news on science have caused to other scientists?     | 3.11     | 1.16      | -                      |
| Presumed harm on non-expert public                                                                                                                          |          |           |                        |
| On a scale of 1 to 5 ( <i>1 = no harm at all; 5 = a lot of harm</i> ), how much harm do you think fake news on science have caused to the non-expert public | 3.93     | 1.06      | -                      |
| Attitude toward tackling fake news on science                                                                                                               |          |           |                        |
| Engaging in public engagement to tackle fake news on science would be:                                                                                      |          |           |                        |
| Unenjoyable : Enjoyable (ATT1)                                                                                                                              | 3.46     | 1.18      | .64                    |
| Pointless : Worthwhile (ATT2)                                                                                                                               | 4.09     | 1.09      | .89                    |
| Unpleasant : Pleasant (ATT3)                                                                                                                                | 3.44     | 1.14      | .66                    |
| Personal norm                                                                                                                                               |          |           |                        |
| I feel a personal obligation to provide accurate information to tackle fake news on science. (PN1)                                                          | 3.97     | .98       | .90                    |
| I feel morally obliged to provide accurate information to tackle fake news on science, regardless of what others do. (PN2)                                  | 3.99     | .96       | .94                    |
| I feel guilty if I do not provide accurate information to tackle fake news on science. (PN3)                                                                | 3.70     | 1.09      | .77                    |
| Support for education                                                                                                                                       |          |           |                        |
| Within the next 12 months, I would support...<br>The government allocating more resources into educating the public on fake news on science. (EDU1)         | 3.88     | .88       | .84                    |
| Media authorities organising more educational programmes for the public to be aware of fake news on science. (EDU2)                                         | 3.96     | .84       | .91                    |
| Educational institutes organising activities for students to understand fake news on science. (EDU3)                                                        | 4.02     | .82       | .84                    |

| Variables                                                                                      | <i>M</i> | <i>SD</i> | <i>Factor loadings</i> |
|------------------------------------------------------------------------------------------------|----------|-----------|------------------------|
| Support for legislation                                                                        |          |           |                        |
| Within the next 12 months, I would support...                                                  |          |           |                        |
| Censorship of the Internet on fake news on science. (LEG1)                                     | 3.51     | 1.11      | .76                    |
| The closing down of online sources that have been found to spread fake news on science. (LEG2) | 3.77     | 1.07      | .79                    |
| Legislation to prohibit the spread of fake news on science. (LEG3)                             | 3.73     | 1.07      | .87                    |
| The formation of a panel to screen out fake news on science. (LEG4)                            | 3.63     | 1.03      | .81                    |

*Appendix B: Correlations among the IPMI variables*

| Variable                                     | 1     | 2     | 3     | 4     | 5     | 6     | 7 |
|----------------------------------------------|-------|-------|-------|-------|-------|-------|---|
| 1 Scientists' attention to fake science news | -     |       |       |       |       |       |   |
| 2 Presumed harm on other scientists          | .34** | -     |       |       |       |       |   |
| 3 Presumed harm on general public            | .16** | .25** | -     |       |       |       |   |
| 4 Attitude                                   | .16** | .10*  | .17** | -     |       |       |   |
| 5 Personal norm                              | .25** | .30** | .14** | .28** | -     |       |   |
| 6 Support for education initiatives          | .08*  | .14** | .26** | .30** | .33** | -     |   |
| 7 Support for legislations                   | .04   | .08*  | .10** | .24** | .31** | .53** | - |

*Note.* \*\* Correlation was significant at the .01 level (2-tailed); \* Correlation was significant at the .05 level (2-tailed)
